# Supplementary material for: Anion-induced electronic localization and polarized cobalt clusters for highly efficient water splitting
Source: Royal Society of Chemistry journal article supplement (doi:10.1039/d3mh01130e), 2023-01-01
Supplement: d3mh01130e1.pdf [file d3mh01130e1.pdf]

*Supporting Information for*

# Anion-induced Electronic Localization and Polarized Cobalt Clusters for Highly-efficient Water Splitting

*Yucheng Wu, Yanli Yu, Wei Shen, Yimin Jiang, Rongxing He\*, Ming Li\**

Key Laboratory of Luminescence Analysis and Molecular Sensing (Southwest University), Ministry of Education, College of Chemistry and Chemical Engineering, Southwest University, Chongqing 400715, P. R. China

---

\*Corresponding author: E-mail address, [herx@swu.edu.cn](mailto:herx@swu.edu.cn) (R. He),  
[liming@swu.edu.cn](mailto:liming@swu.edu.cn) (M. Li).

## Theoretical calculations

Density functional theory (DFT) calculations were performed within the Vienna Ab initio Simulation Package (VASP)<sup>1,2</sup>. The interaction between core electrons and ions was described by a projector truncated wave (PAW) with a truncation energy of 400 eV, and the  $k$  point in the Brillouin region was set to  $3 \times 3 \times 1$ . The generalized gradient approximation (GGA) functional of Perdew-Burke-Ernzerhof (PBE) functional was applied as the exchange-correlation functional. The vacuum layer in the z-axis direction was set to 15 Å to avoid the interaction between periodical images. In the calculation process, the convergence standard of energy and force were  $10^{-5}$  eV and  $0.02$  eV Å<sup>-1</sup>, respectively. Based on previous work<sup>3-6</sup>, Graphene (001) was used to simulate a small plane of carbon nanotubes. The carbon nanotube with replacing a C atom by a N atom, as a model, served as the nitrogen-doped carbon nanotube. According to previous reports<sup>7,8</sup>, the Co cluster was simulated by multiple Co atoms. Based on the Co NCNTs model, an N atom was adsorbed to the Co cluster to construct the N-Co NCNTs model because Co and N are connected through the Co-N bond. The dimensions of the N-Co NCNTs and Co NCNTs supercell are both  $9.840 \times 9.840 \times 18.40$  Å<sup>3</sup> and the angles of N-Co NCNTs and Co NCNTs models are both 90 degrees  $\times$  90 degrees  $\times$  120 degrees. The free energies of H<sub>2</sub>, H<sub>2</sub>O, and O<sub>2</sub> were collected from previous works<sup>9-11</sup>. The reaction Gibbs free energies of alkaline OER four elementary steps were described as follows:

$$\Delta G_1 = G_{OH^*} + G_{H^+ + e^-} - G_{H_2O(l)} - G_*$$

$$\Delta G_2 = G_{O^*} + G_{H^+ + e^-} - G_{OH^*}$$

$$\Delta G_3 = G_{OOH^*} + G_{H^+ + e^-} - G_{H_2O(l)} - G_{O^*}$$

$$\Delta G_4 = G_{O^*} + G_{O_2(g)} + G_{H^+ + e^-} - G_{OOH^*}$$

where \* denotes the surface bound species. For HER, the Gibbs free-energy ( $\Delta G_{H^*}$ ) was expressed as:  $\Delta G_{H^*} = \Delta E_{H^*} + \Delta ZPE - T\Delta S$ , where  $E_{ZPE}$  is the zero energy,  $\Delta S$  is the entropy change, and T is the system temperature (298.15K, in our work).

## Figures and Tables:

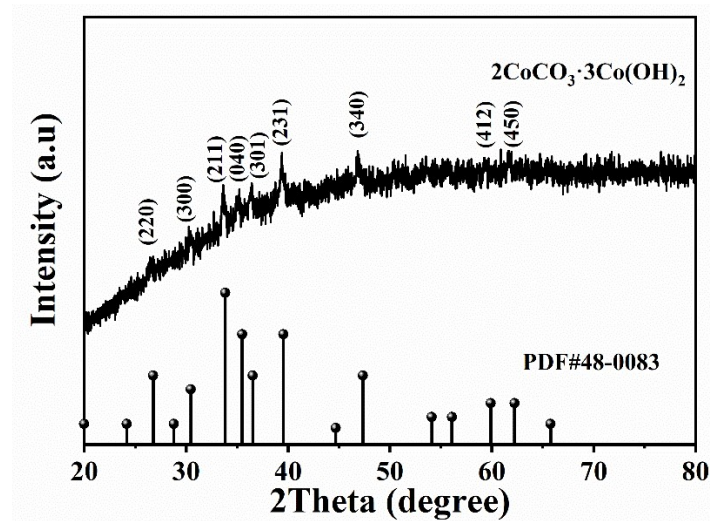

**Fig S1.** XRD spectra of the Co(II) carbonate hydroxide.

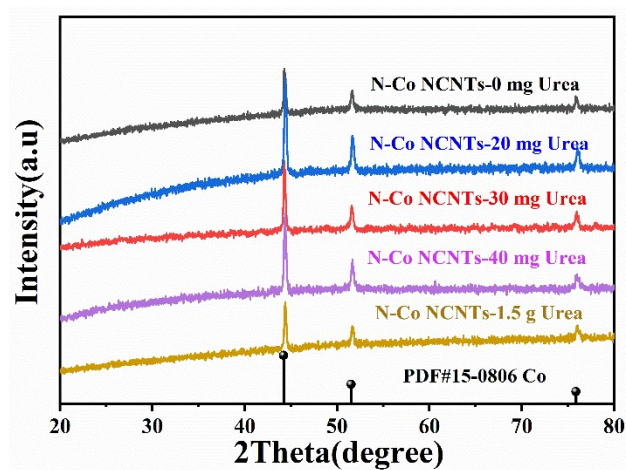

**Fig S2.** XRD spectra of the catalysts with different amount of urea.

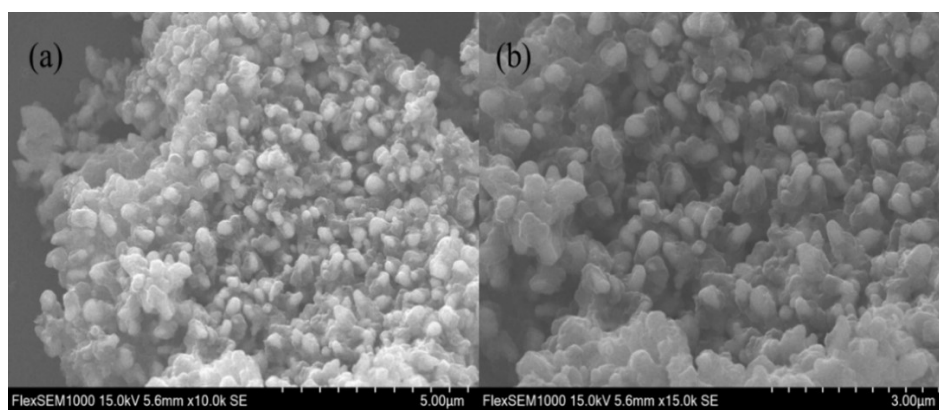

**Fig S3.** SEM images of Co NCNTs.

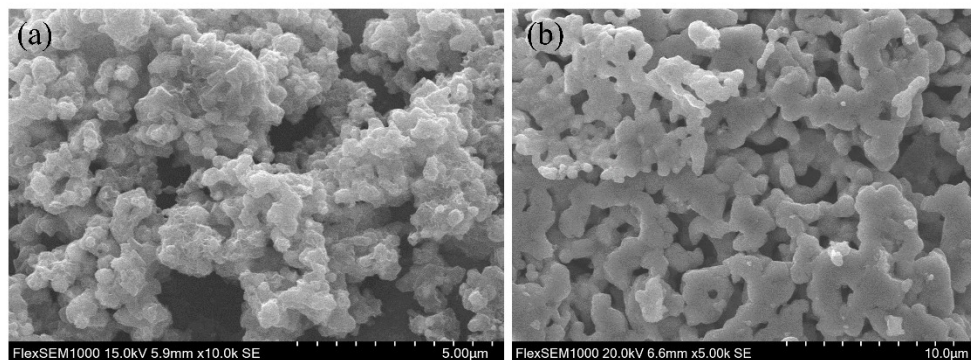

**Fig S4.** SEM image of N-Co NCNTs obtained at (a) 600 °C and (b) 800 °C.

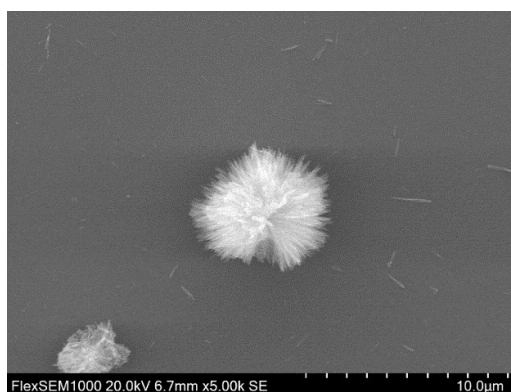

Fig S5. SEM image of sea urchin-like Co (II) carbonate hydroxide.

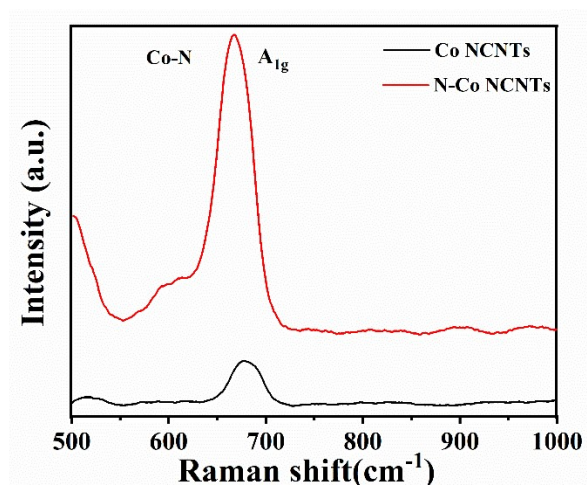

Fig S6. Raman spectra of N-Co NCNTs and Co NCNTs.

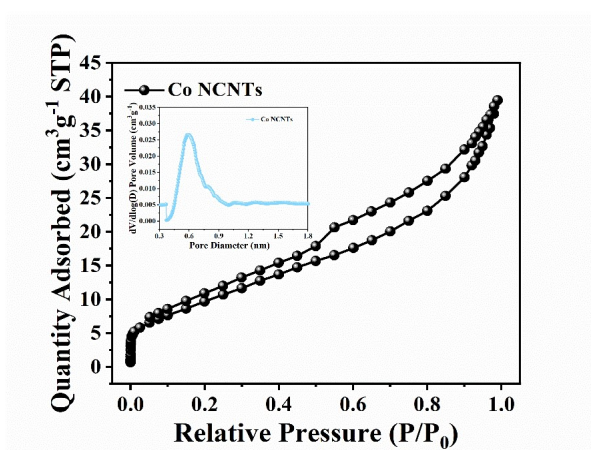

Fig S7. The N<sub>2</sub> adsorption–desorption isotherm and pore-size distribution (inset) of Co NCNTs.

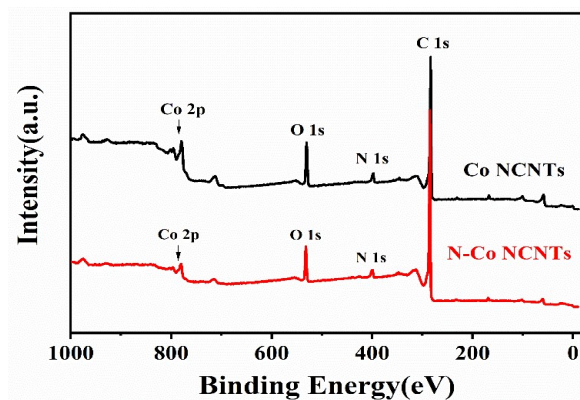

**Fig S8.** The XPS survey spectrum of N-Co NCNTs and Co NCNTs.

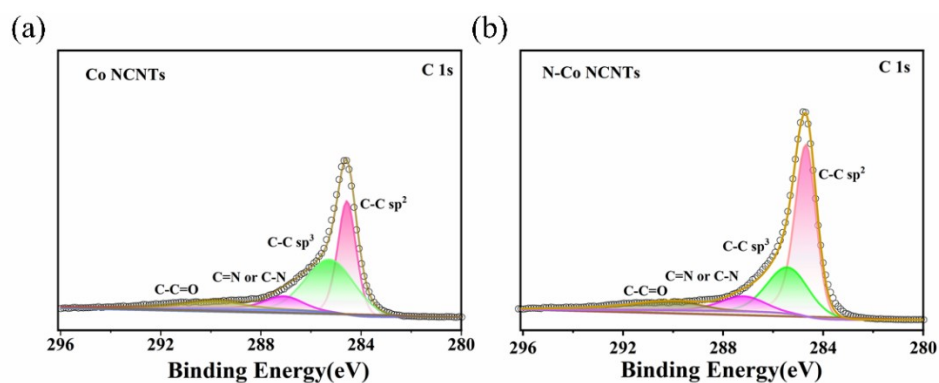

**Fig S9.** High-resolution C 1s spectra of Co NCNTs and N-Co NCNTs.

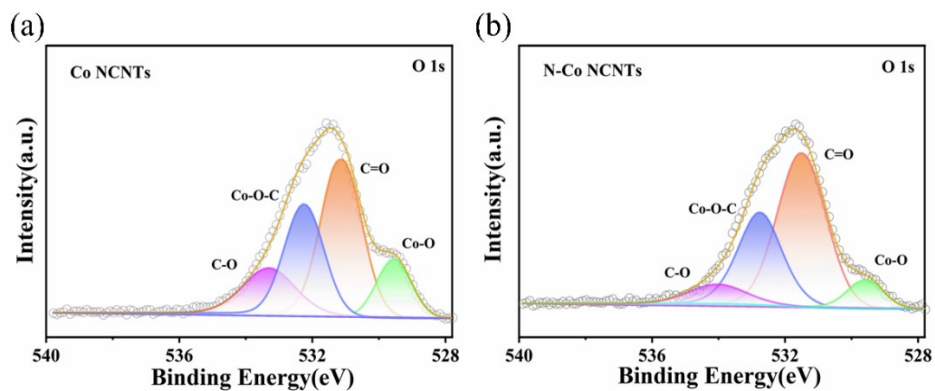

**Fig S10.** High-resolution O 1s spectra of Co NCNTs and N-Co NCNTs.

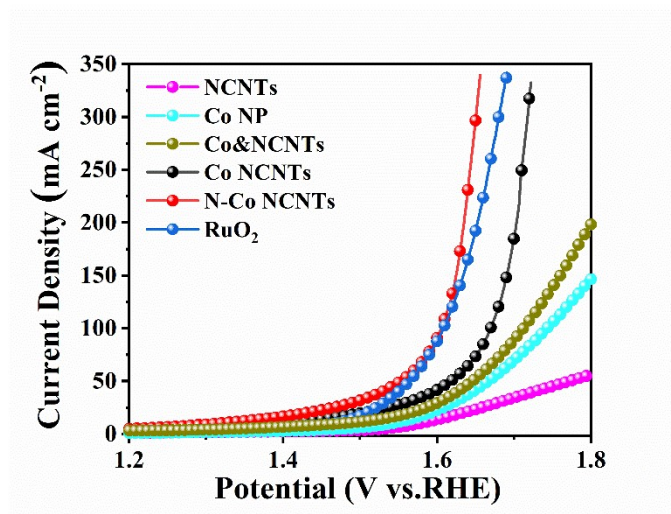

Fig S11. OER polarization curves of N-Co NCNTs, Co NCNTs, Co-NCNTs, Co NP, RuO<sub>2</sub> and NCNTs.

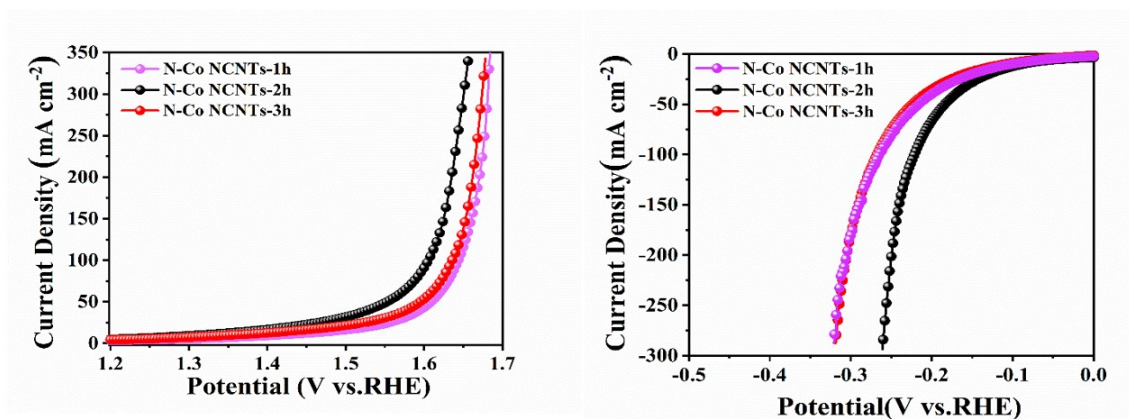

Fig S12. LSV polarization curves of N-Co NCNTs at different annealing times.

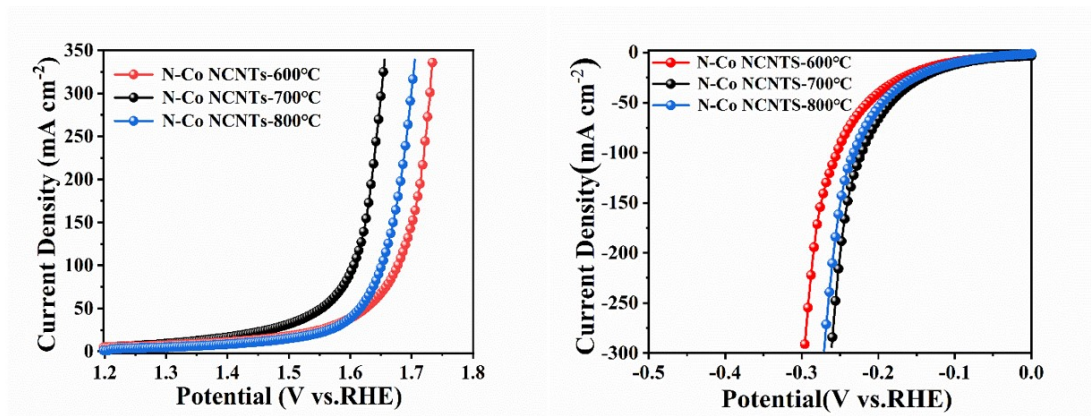

Fig S13. LSV polarization curves of N-Co NCNTs at different annealing temperatures.

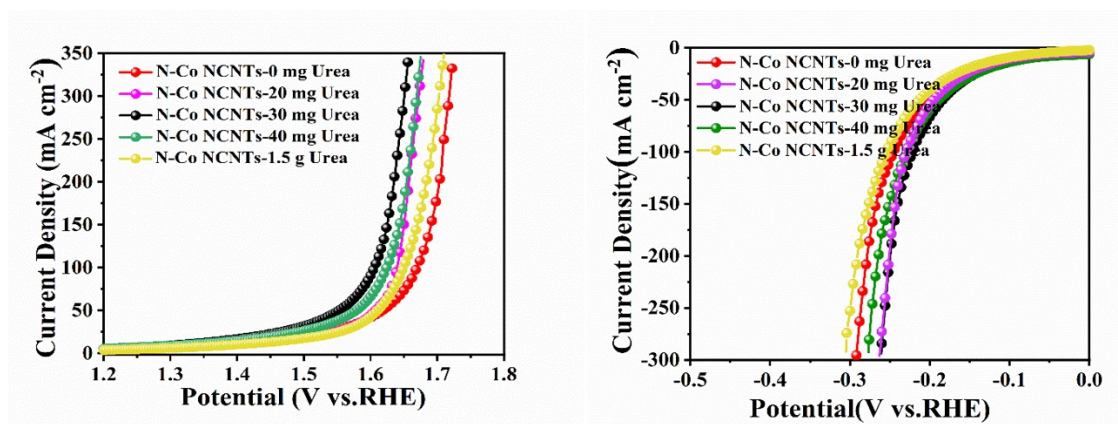

Fig S14. LSV polarization curves of N-Co NCNTs with different amount of urea.



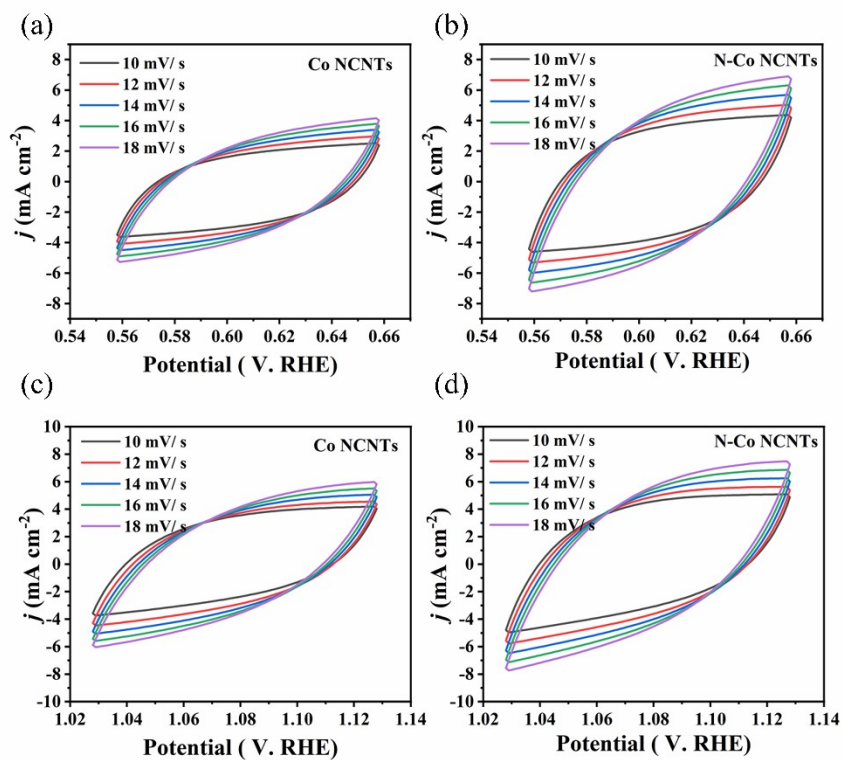

Fig S15. Cyclic voltammety curves for the HER (a,b) and for the OER (c,d).

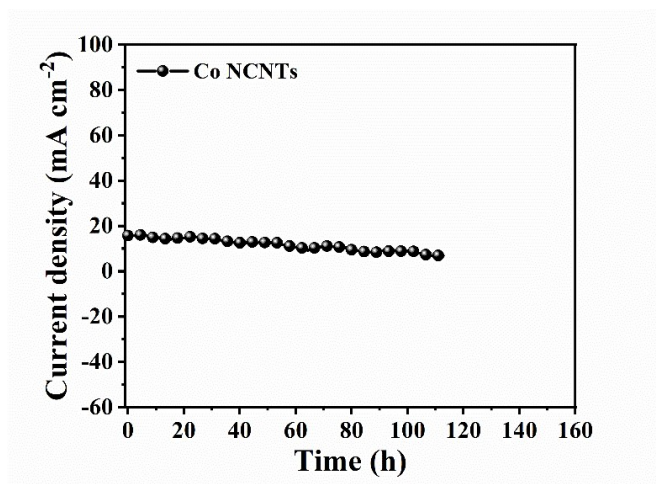

Fig S16. Time-dependent current density curve of Co NCNTs for OER in alkaline solution.

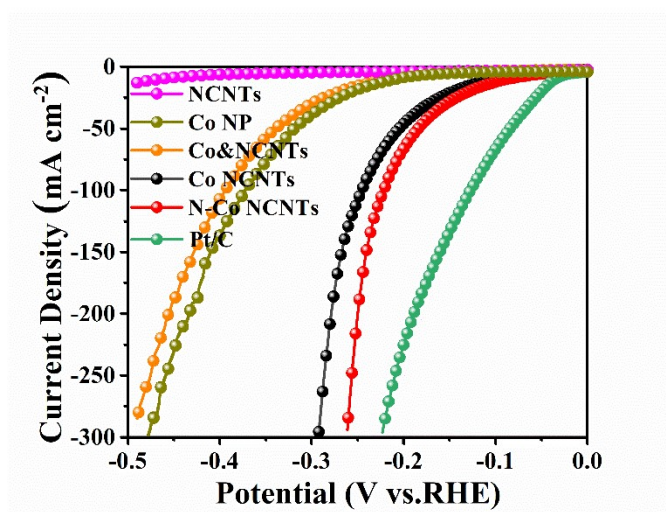

**Fig S17.** HER polarization curves of N-Co NCNTs, Co NCNTs, Co-NCNTs, Co NP, Pt/C and NCNTs.

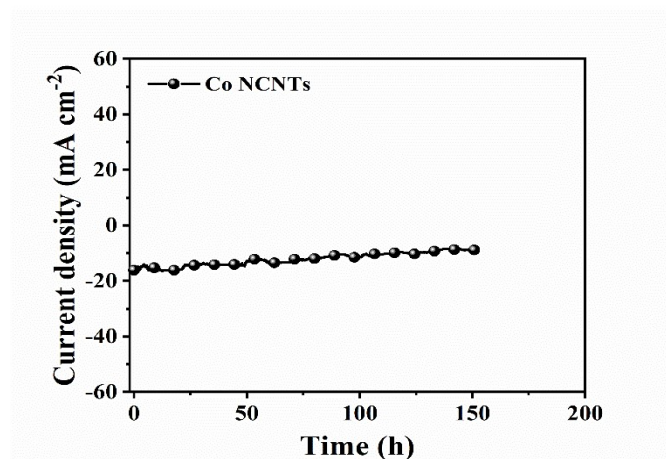

**Fig S18.** Time-dependent current density curve of Co NCNTs for HER in alkaline solution.

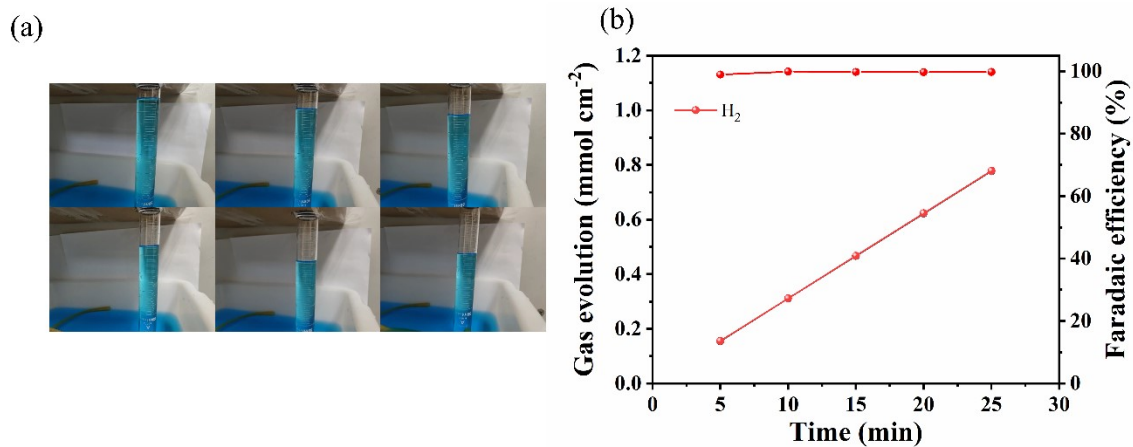

**Fig S19.** (a) Hydrogen volume for Faraday efficiency experiment of HER. (b) Faraday efficiency of N-Co NCNTs for HER.

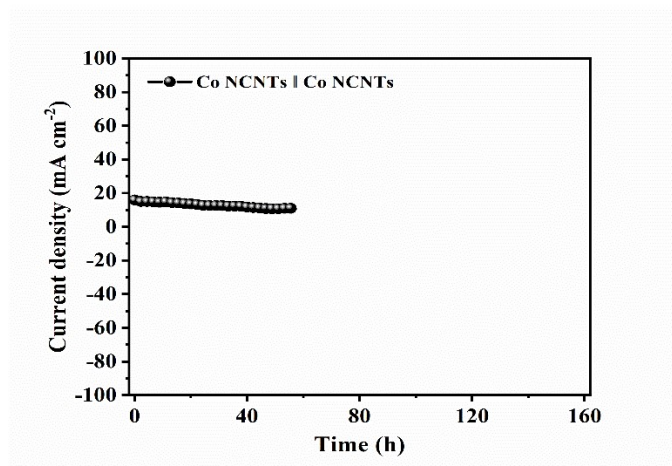

**Fig S20.** Stability testing of Co-NCNTs.

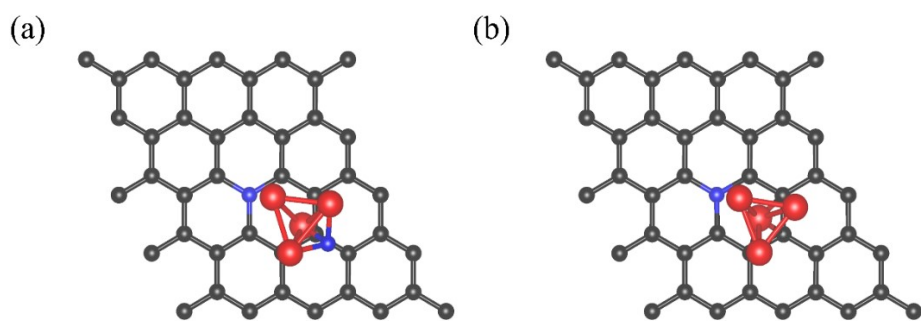

**Fig S21.** Theoretical models for N-Co NCNTs (a) and Co-NCNTs (b).

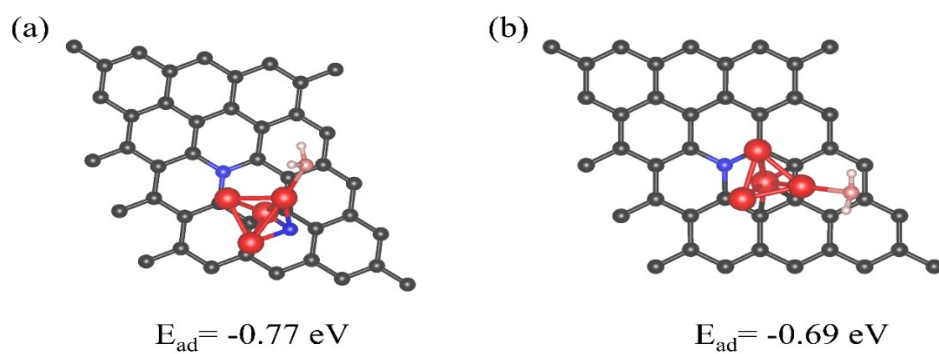

**Fig S22.** Adsorption energies of H<sub>2</sub>O adsorption on N-Co NCNTs (a) and Co NCNTs (b).

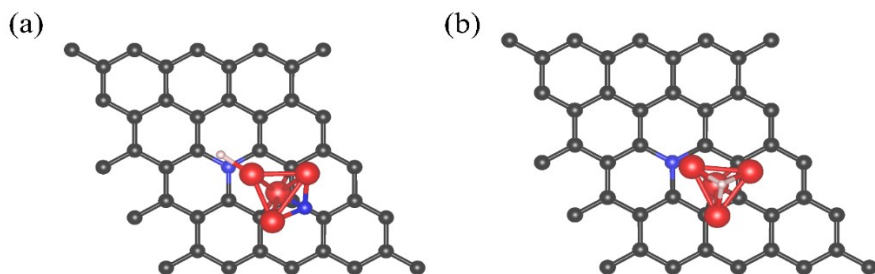

**Fig S23.** Adsorption model of H\* intermediates of N-Co NCNTs (a) and Co NCNTs (b).

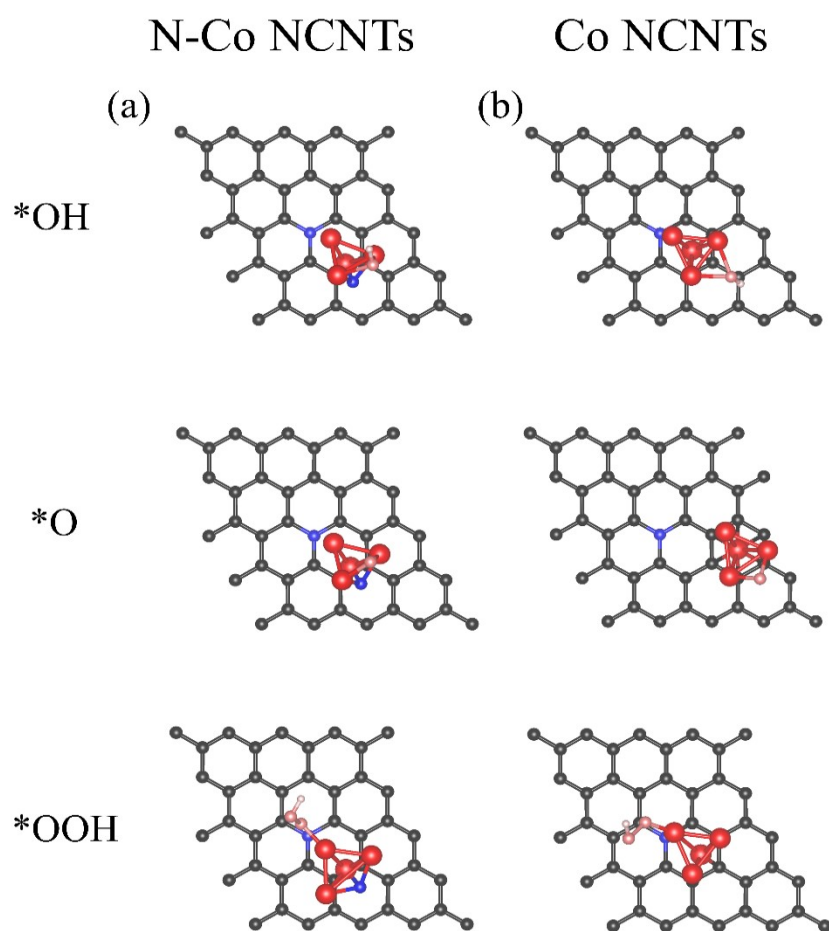

**Fig S24.** Optimization models for intermediates of N-Co NCNTs (a) and Co NCNTs (b) in OER.

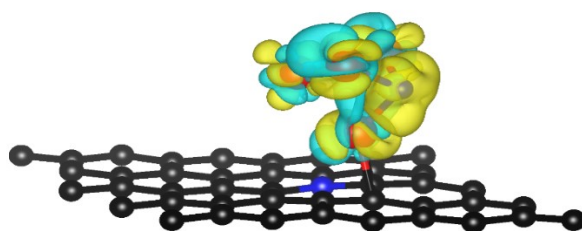

**Fig S25.** Charge Density difference of N-Co NCNTs.

**Table S1.** Comparison of the recently-reported cobalt based catalysts for overall water splitting.

| <b>Catalysts</b>                       | <b>Electrolyte (KOH)</b> | <b><math>\eta_{10}</math> (V)</b> | <b>Durability (h)</b> | <b>Ref.</b> |
|----------------------------------------|--------------------------|-----------------------------------|-----------------------|-------------|
| N-Co NCNTs   N-Co NCNTs                | 1.0                      | 1.53                              | 100                   | This work   |
| CoTe <sub>2</sub> /CoP                 | 1.0                      | 1.55                              | 30                    | 12          |
| Co <sub>5.47</sub> N/MoN               | 1.0                      | 1.59                              | 16                    | 13          |
| VCoCO <sub>x</sub> @NF                 | 1.0                      | 1.54                              | 70                    | 14          |
| Co/CoO@NC@CC                           | 1.0                      | 1.66                              | 25                    | 15          |
| CoSe <sub>2</sub> /CNTs                | 1.0                      | 1.75                              | 24                    | 16          |
| Part-Ph Co@Co-P@NPCNTs                 | 1.0                      | 1.63                              | 24                    | 17          |
| NiCo <sub>2</sub> P <sub>x</sub> /CNTs | 1.0                      | 1.61                              | 48                    | 18          |
| Co-NCNTFs/NF                           | 1.0                      | 1.62                              | 10                    | 19          |
| CoFe@N-CNTs-800                        | 1.0                      | 1.64                              | 20                    | 20          |

## References

- 1 Kresse, G.; Furthmüller, J., *Phys. Rev. B* **54**, 11169.
- 2 Kresse, G.; Furthmüller, J., *Comp. Mater. Sci.* **6**, 15-50.
- 3 Liu, Y.; Zhang, S.; Jiao, C.; Chen, H.; Wang, G.; Wu, W.; Zhuo, Z.; Mao, J., *Adv. Sci.* **2023**, **10**, e2206107.
- 4 Kattel, S.; Wang, G., *J. Mater. Chem. A* **2013**, **1**, 10790.
- 5 Lin, S.-Y.; Xia, L.-X.; Zhang, L.; Feng, J.-J.; Zhao, Y.; Wang, A.-J., *Chem. Eng. J.* **2021**, **424**, 130559.
- 6 Li, J.; Qian, J.; Chen, X.; Zeng, X.; Li, L.; Ouyang, B.; Kan, E.; Zhang, W., *Compos. Part B Eng.* **2022**, **231**, 109573.
- 7 Zhang, Z.; Li, X.; Zhong, C.; Zhao, N.; Deng, Y.; Han, X.; Hu, W., *Angew. Chem. Int. Ed.* **2020**, **59**, 7245-7250.
- 8 Kitano, S.; Noguchi, T. G.; Nishihara, M.; Kamitani, K.; Sugiyama, T.; Yoshioka, S.; Miwa, T.; Yoshizawa, K.; Staykov, A.; Yamauchi, M., *Adv. Mater.* **2022**, **34**, e2110552.
- 9 Nørskov, J. K.; Rossmeisl, J.; Logadottir, A.; Lindqvist, L.; Kitchin, J. R.; Bligaard, T.; Jonsson, H., *J. Phys. Chem. B* **2004**, **108**, 17886-17892.
- 10 Nie, X.; Luo, W.; Janik, M. J.; Asthagiri, A., *J. Catal.* **2014**, **312**, 108-122.
- 11 Choudhury, P.; Bhethanabotla, V. R.; Stefanakos, E., *J. Phys. Chem. C* **2009**, **113**, 13416-13424.
- 12 Yang, L.; Cao, X.; Wang, X.; Wang, Q.; Jiao, L., *Appl. Catal. B Environ.* **2023**, **329**, 122551.
- 13 Zhu, J.; Du, Q.; Arif Khan, M.; Zhao, H.; Fang, J.; Ye, D.; Zhang, J., *Appl. Surf. Sci.* **2023**, **623**, 156989.
- 14 Meena, A.; Thangavel, P.; Nissimagoudar, A. S.; Narayan Singh, A.; Jana, A.; Sol Jeong, D.; Im, H.; Kim, K. S., *Chem. Eng. J.* **2022**, **430**, 132623.
- 15 Dai, K.; Zhang, N.; Zhang, L.; Yin, L.; Zhao, Y.; Zhang, B., *Chem. Eng. J.* **2021**, **414**, 128804.
- 16 Wei, G.; Du, K.; Zhao, X.; Wang, J.; Yan, W.; An, C.; An, C., *Chin. Chem. Lett.* **2020**, **31**, 2641-2644.
- 17 Jiao, J.; Yang, W.; Pan, Y.; Zhang, C.; Liu, S.; Chen, C.; Wang, D., *Small* **2020**, **16**, e2002124.
- 18 Huang, C.; Ouyang, T.; Zou, Y.; Li, N.; Liu, Z.-Q., *J. Mater. Chem. A* **2018**, **6**, 7420-7427.
- 19 Yuan, Q.; Yu, Y.; Gong, Y.; Bi, X., *ACS Appl. Mater. Interfaces* **2020**, **12**, 3592-3602.
- 20 Guo, P.; Wu, R.; Fei, B.; Liu, J.; Liu, D.; Yan, X.; Pan, H., *J. Mater. Chem. A* **2021**, **9**, 21741-21749.
